# Supplementary material
Source: PubMed Central journal article supplement (PMC5753877)
Supplement: 89FileS1.pdf [file 89FileS1.pdf]

## Supplement 1

**Case 1: Centered Two-Sided Truncation** Provided both  $x_a$  and  $x_b$  are symmetrically allocated around the mean of  $P$  and  $F_1$ , it follows that  $i$  and  $k$  (Eqs. 4 and 5) are reduced to

$$\begin{aligned} i &= 0; \\ k &= \frac{\beta\phi(\beta) - \alpha\phi(\alpha)}{\Phi(\beta) - \Phi(\alpha)}. \end{aligned} \quad (\text{S1.1})$$

Correspondingly Eq. 10 is simplified to

$$\frac{pr}{P(Y)} = \Phi\left(\frac{\beta}{\sqrt{1-0.5Bkh^4}}\right) - \Phi\left(\frac{\alpha}{\sqrt{1-0.5Bkh^4}}\right). \quad (\text{S1.2})$$

Due to the symmetry of the cdf, the above equation yields

$$\frac{pr}{P(Y)} = \left(1 - \Phi\left(\frac{\alpha}{\sqrt{1-0.5Bkh^4}}\right)\right) - \Phi\left(\frac{\alpha}{\sqrt{1-0.5Bkh^4}}\right), \quad (\text{S1.3})$$

which can be further simplified as

$$\Phi^{-1}\left(0.5 - \frac{pr}{2P(Y)}\right) = \frac{\alpha}{\sqrt{1-0.5Bkh^4}}, \quad (\text{S1.4})$$

where  $\Phi^{-1}(x)$  is the quantile function (inverse of the cdf) and  $h^2$  is then calculated as

$$h^2 = \frac{\sqrt{2}}{|Q|} \left(\frac{Q^2 - \alpha^2}{Bk}\right)^{\frac{1}{2}}, \quad (\text{S1.5})$$

where  $Q = \Phi^{-1}\left(0.5 - \frac{pr}{2P(Y)}\right)$ .

**Case 2: Right-Sided Truncation** When  $x_b \rightarrow +\infty$  (Fig. 1),  $i$  and  $k$  (Eqs. 4 and 5) reduce to

$$\begin{aligned} i &= \frac{\phi(\alpha)}{1 - \Phi(\alpha)}; \\ k &= i(i - \alpha). \end{aligned} \quad (\text{S1.6})$$

Under these circumstances,  $i$  and  $k$  correspond to the standard tabulated values for the right-truncated selection (e.g. (Falconer and Mackay 1996)) and the rearrangement of Eq. 10 leads to

$$\frac{pr}{P(Y)} = 1 - \Phi\left(\frac{\alpha - Bih^2}{\sqrt{1-0.5Bkh^4}}\right), \quad (\text{S1.7})$$

and

$$\Phi^{-1}\left(1 - \frac{pr}{P(Y)}\right) = \frac{\alpha - Bih^2}{\sqrt{1-0.5Bkh^4}}. \quad (\text{S1.8})$$

Further arrangement leads to

$$h^2 = \frac{2\alpha Bi \pm [4\alpha^2 B^2 i^2 - 2(2B^2 i^2 + BQ'^2 k)(\alpha^2 - Q'^2)]^{\frac{1}{2}}}{(2B^2 i^2 + BQ'^2 k)}, \quad (\text{S1.9})$$

where  $Q' = \Phi^{-1}\left(1 - \frac{pr}{P(Y)}\right)$ . There are two solutions of the above equation and verification using Eq. S1.7 provides the unique one.

**Variance of the  $h^2$  estimate** Here we use the general  $h^2$  estimate (Eq. 10) and further, we assume that  $p$ ,  $i$ , and  $k$  are constants as they are all functions of the known input parameters  $x_a$ ,  $x_b$ ,  $\mu$ , and  $\sigma_p^2$ . Thus, to evaluate the variance of the  $h^2$  estimate, we assume that  $h^2$  is the exclusive function of  $r$ . Utilizing the maximum likelihood and linearization methods, we derived the following standard errors.

The standard error associated of the general  $h^2$  estimate (Eq. 10) is

$$\text{s.e.}\{h^2\} = \frac{(1 - 0.5h^4kB)^{\frac{3}{2}}}{|\phi(b)(-iB + 0.5h^2\beta kB) - \phi(a)(-iB + 0.5h^2\alpha kB)|} \frac{p}{P(Y)} \sqrt{r(1-r)} \frac{1}{\sqrt{n}}, \quad (\text{S1.10})$$

where  $n$  is the number of progeny in  $p$ ,  $h^2 \neq 0$  under symmetric two-sided truncation, and  $a$  and  $b$  are

$$\begin{aligned} a &= \frac{\alpha - Bih^2}{\sqrt{1 - 0.5Bkh^4}}, \\ b &= \frac{\beta - Bih^2}{\sqrt{1 - 0.5Bkh^4}}. \end{aligned} \quad (\text{S1.11})$$

The standard error of the  $h^2$  estimate for the scenario of right-sided truncation (Eq. 12) is

$$\text{s.e.}\{h^2\} = \frac{(1 - 0.5h^4kB)^{\frac{3}{2}}}{|-\phi(a)(-iB + 0.5h^2\alpha kB)|} \frac{p}{P(Y)} \sqrt{r(1-r)} \frac{1}{\sqrt{n}}. \quad (\text{S1.12})$$
